# Supplementary material
Source: PubMed Central journal article supplement (PMC3993327)
Supplement: JB.01323-13_zjb999093126so1.pdf [file JB.01323-13_zjb999093126so1.pdf]

# Supplemental material

## **Diversity of O-antigen repeat-unit structures can account for the substantial sequence variation of Wzx translocases**

Yaoqin Hong<sup>†</sup> and Peter R. Reeves<sup>†‡</sup>

<sup>†</sup>School of Molecular Bioscience, The University of Sydney, NSW 2006 Australia

<sup>‡</sup>Corresponding author

For correspondence

Email: [peter.reeves@sydney.edu.au](mailto:peter.reeves@sydney.edu.au)

Telephone: +61 2 9351 2536

Table S1. The oligonucleotides used for clonings in this study.

| <b>Primer</b>                                                                                                       | <b>DNA sequence 5' to 3' *</b>                                    | <b>Description</b>                                                                                                                                                                       |
|---------------------------------------------------------------------------------------------------------------------|-------------------------------------------------------------------|------------------------------------------------------------------------------------------------------------------------------------------------------------------------------------------|
| 6827                                                                                                                | TAT <b>CCA TGG</b> TAT ATA TAA TAA <u>TC</u>                      | Forward primer for <i>wbbL</i> cloning, consists of 3b dummy sequence, the <b>NcoI</b> site, and 18b priming sequence homologous to the start of <i>wbbL</i> .                           |
| 6828                                                                                                                | CTG <b>GGA TCC</b> TTA TAT TAC GGG <u>TGA AAA</u>                 | Reverse primer for <i>wbbL</i> cloning, consists of 3b dummy sequence, the <b>BamHI</b> site, and 18b priming sequence homologous to the end of <i>wbbL</i> .                            |
| 6851                                                                                                                | TAT <b>CCATGG</b> AA <u>ATG AAT ACG</u><br><u>AAT AAA TTA TCT</u> | Forward primer for <i>wzx<sub>016</sub></i> cloning, consists of 3b dummy sequence, the <b>NcoI</b> site, and 18b priming sequence homologous to the start of <i>wzx<sub>016</sub></i> . |
| 6966                                                                                                                | GTA AGT <b>CTG CAG</b> <u>CAA CAA TGA</u><br><u>TAT AAT CGT</u>   | Reverse primer for <i>wzx<sub>016</sub></i> cloning, consists of 6b dummy sequence, the <b>PstI</b> site, and 18b priming sequence homologous to the end of <i>wzx<sub>016</sub></i> .   |
| * Note that the <b>restriction sites</b> are in <b>Bold</b> and the <u>homology regions</u> are <u>Underlined</u> . |                                                                   |                                                                                                                                                                                          |

Table S2. The oligonucleotides used for strain constructions in this study.

| Primer | DNA sequence 5' to 3'                                                                                    | Description                                                                                                                                                                                                                                                                                                                                                                                                             |
|--------|----------------------------------------------------------------------------------------------------------|-------------------------------------------------------------------------------------------------------------------------------------------------------------------------------------------------------------------------------------------------------------------------------------------------------------------------------------------------------------------------------------------------------------------------|
| 6872F  | AAG ATC CCC TCA CGC TGC CGC                                                                              | Primer pair designed to amplify the <i>kan</i> gene from pKD4, 6873R has <b>42b</b> homologous to sequence just after <i>wzx</i> <sub>O16</sub> in the O16 gene cluster                                                                                                                                                                                                                                                 |
| 6873R  | AAC AAA CCA GAA CCA ACA ATG ATA TAA<br>TCG TAC ATA AAA TCC TCA GAA GAA CTC<br>GTC AAG AAG                |                                                                                                                                                                                                                                                                                                                                                                                                                         |
| 6900F  | TTT ACG TTA GAT GAG CTT ATC AGA TTA AAA TTA<br>ATT GCA TGA TGA ATA CGA ATA AAT TAT CTT<br>TAA GAA GAA    | Primer pair designed to amplify the <i>wzx</i> <sub>O16</sub> gene from <i>E.coli</i> K-12 MG1655; 6900F has <i>42b</i> homologous to sequence just before <i>wzx</i> <sub>O16</sub> in the O16 gene cluster; 6874R has <u>21b</u> homologous to the 6872F primer. 6900F/6873R are used to generate the <i>wzx</i> <sub>O16</sub> - <i>kan</i> control knock in cassette using products of 6900F/6874R and 6872F/6873R. |
| 6874R  | GCG GCA GCG TGA GGG GAT CTT TCA GCA AAC<br>CAG TAA TTT ATT                                               |                                                                                                                                                                                                                                                                                                                                                                                                                         |
| 6901F  | TTT ACG TTA GAT GAG CTT ATC AGA TTA AAA TTA<br>ATT GCA TGA TGG TAT TAA CAG TGA AAA AAA<br>TTT TAG CGT TT | Primer pair designed to amplify the <i>wzx</i> <sub>O111</sub> gene from <i>E.coli</i> O111; 6901F has <i>42b</i> homologous to sequence just before <i>wzx</i> <sub>O16</sub> in the O16 gene cluster; 6877R has <u>21b</u> homologous to the 6872F primer. 6901F/6873R are used to generate the <i>wzx</i> <sub>O111</sub> - <i>kan</i> knock in cassette using products of 6901F/6874R and 6872F/6873R.              |
| 6877R  | GCG GCA GCG TGA GGG GAT CTT TCA ATA GAC<br>ATT TTT CGC TCT                                               |                                                                                                                                                                                                                                                                                                                                                                                                                         |
| 6787F  | TTT ACG TTA GAT GAG CTT ATC AGA TTA AAA TTA<br>ATT GCA TGA TGA ATA ACA AAC TAG CCA GGC<br>A              | Primer pair designed to amplify the <i>wzx</i> <sub>O7</sub> gene from <i>E.coli</i> O7; 6787F has <i>42b</i> homologous to sequence just before <i>wzx</i> <sub>O16</sub> in the O16 gene cluster; 6875R has <u>21b</u> homologous to the 6872F primer. 6787F/6873R are used to generate the <i>wzx</i> <sub>O7</sub> - <i>kan</i> knock in cassette using products of 6787F/6875R and 6872F/6873R.                    |
| 6875R  | GCG GCA GCG TGA GGG GAT CTT TCA GTC CTT<br>ATT TTT TAT GAG                                               |                                                                                                                                                                                                                                                                                                                                                                                                                         |
| 6840F  | TTT ACG TTA GAT GAG CTT ATC AGA TTA AAA TTA<br>ATT GCA TGA TGA GCA TAA TAA AAA ATA GTG<br>T              | Primer pair designed to amplify the <i>wzx</i> <sub>Sf2a</sub> gene from <i>Shi. flexneri</i> 2a; 6840F has <i>42b</i> homologous to sequence just before <i>wzx</i> <sub>O16</sub> in the O16 gene cluster; 6878R has <u>21b</u> homologous to the 6872F primer. 6840F/6873R are used to generate the <i>wzx</i> <sub>Sf2a</sub> - <i>kan</i> knock in cassette using products of 6840F/6878R and 6872F/6873R.         |
| 6878R  | GCG GCA GCG TGA GGG GAT CTT TTA GTT TTC<br>ATA TAC AGA ACA                                               |                                                                                                                                                                                                                                                                                                                                                                                                                         |
| 6781F  | TTT ACG TTA GAT GAG CTT ATC AGA TTA AAA TTA<br>ATT GCA TGA TGA TAA TAA ATA AAA TCA AAA<br>A              | Primer pair designed to amplify the <i>wzx</i> <sub>O157</sub> gene from <i>E.coli</i> O157; 6781F has <i>42b</i> homologous to sequence just before <i>wzx</i> <sub>O16</sub> in the O16 gene cluster; 6876R has <u>21b</u> homologous to the 6872F primer. 6781F/6873R are used to generate the <i>wzx</i> <sub>O157</sub> - <i>kan</i> knock in cassette using products of 6781F/6876R and 6872F/6873R.              |
| 6876R  | GCG GCA GCG TGA GGG GAT CTT TCA TCC TCT<br>TAT ATT TAA CTG                                               |                                                                                                                                                                                                                                                                                                                                                                                                                         |
| 6841F  | TTT ACG TTA GAT GAG CTT ATC AGA TTA AAA TTA<br>ATT GCA TGA TGA AAG TTC AAT TGT TAA AAA<br>T              | Primer pair designed to amplify the <i>wzx</i> <sub>SeLT2</sub> gene from <i>S. enterica</i> LT2; 6841F has <i>42b</i> homologous to sequence just before <i>wzx</i> <sub>O16</sub> in the O16 gene cluster; 6879R has <u>21b</u> homologous to the 6872F primer. 6841F/6873R are used to generate the <i>wzx</i> <sub>SeLT2</sub> - <i>kan</i> knock in cassette using products of 6841F/6879R and 6872F/6873R.        |
| 6879R  | GCG GCA GCG TGA GGG GAT CTT TTA TCC CTT<br>ATT TGC CTT AAT                                               |                                                                                                                                                                                                                                                                                                                                                                                                                         |
| 6797F  | TTT ACG TTA GAT GAG CTT ATC AGA TTA AAA TTA<br>ATT GCA TGA GTG TAG GCT GGA GCT GCT TC                    | Primer pair designed to generate the recombination cassette for the replacement of the <i>wzx</i> <sub>O16</sub> gene from <i>E.coli</i> K-12 MG1655 O-antigen gene cluster; 6797F has <i>42b</i> homologous to sequence just before <i>wzx</i> <sub>O16</sub> in the                                                                                                                                                   |
| 6873R  | AAC AAA CCA GAA CCA ACA ATG ATA TAA<br>TCG TAC ATA AAA TCC TCA GAA GAA CTC                               |                                                                                                                                                                                                                                                                                                                                                                                                                         |

|       |                                                                                                        |                                                                                                                                                                                                                                                                                                                                                                                     |
|-------|--------------------------------------------------------------------------------------------------------|-------------------------------------------------------------------------------------------------------------------------------------------------------------------------------------------------------------------------------------------------------------------------------------------------------------------------------------------------------------------------------------|
|       | GTC AAG AAG                                                                                            | O16 gene cluster; 6873R has <b>42b</b> homologous to sequence just after <i>wzx</i> <sub>O16</sub> in the O16 gene cluster                                                                                                                                                                                                                                                          |
| 6937F | <u>CCT TTA</u> ATG GGA ATT AGC CAT GGT CC                                                              | Primer pair designed to amplify the <i>cat</i> gene from pKD3; 6937F has <u>6b</u> identical (in reverse direction) to the first 6b of 6935F; 6873R has <b>42b</b> homologous to sequence just after <i>wzx</i> <sub>O111</sub> in the <i>E. coli</i> O111 gene cluster in pPR2105.                                                                                                 |
| 6938R | <b>AAT AGA CAT TTT TCG CTC TAT TAA AAT<br/>AGA CAA AAG CTA CAT GTG TAG GCT GGA<br/>GCT GCT TCG AAG</b> |                                                                                                                                                                                                                                                                                                                                                                                     |
| 6935F | TGG TTT GGT TTT TCC TTC GTT ATA AAG GAG                                                                | Primer pair designed to amplify ~ 250bp sequence just upstream of the <i>wzx</i> <sub>O111</sub> gene in <i>E. coli</i> O111 (pPR2105); 6936R has <b>42b</b> homologous to sequence just after <i>wzx</i> <sub>O16</sub> in the O16 gene cluster. 6935F/6938R are used to generate a <i>wzx</i> <sub>O111</sub> replacement cassette using products of 6935F/6936R and 6937F/6938R. |
| 6936R | <b>ATA TTC ATA TGG ACC ATG GCT AAT TCC<br/>CAT TAA AGG CAC TCT ATT CGA AAT AGA<br/>GTG C</b>           |                                                                                                                                                                                                                                                                                                                                                                                     |

Table S3. Strains and plasmids used in this supplemental material.

| Strains & plasmids                                                                                              | Parent strain | Strain genotype or plasmid description <sup>A</sup>                                                                                                                                        | Source/reference |
|-----------------------------------------------------------------------------------------------------------------|---------------|--------------------------------------------------------------------------------------------------------------------------------------------------------------------------------------------|------------------|
| Strains                                                                                                         |               |                                                                                                                                                                                            |                  |
| P5930                                                                                                           | P5928         | <i>S. enterica</i> group B serovar Typhimurium strain LT2, <i>hsdL trp32 nml flaA66, rpsLxyIT404 llvE452 metE551 metA22 hsdA ΔgalE ΔwbaV</i>                                               | (1)              |
| P9546                                                                                                           | P5930         | P5930, <u>pPR2190</u>                                                                                                                                                                      | This study       |
| P5932                                                                                                           | MG1655        | MG1655, <u>wzx<sub>O16</sub> gene replaced by a kan gene</u>                                                                                                                               | This study       |
| P5946                                                                                                           | P5937         | MG1655, <u>wzx<sub>O16</sub> gene replaced by wzx<sub>O16</sub>-kan, pPR2191</u>                                                                                                           | This study       |
| P5944                                                                                                           | P5933         | MG1655, <u>wzx<sub>O16</sub> gene replaced by wzx<sub>O7</sub>-kan, pPR2191</u>                                                                                                            | This study       |
| P5947                                                                                                           | P5938         | MG1655, <u>wzx<sub>O16</sub> gene replaced by wzx<sub>O111</sub>-kan, pPR2191</u>                                                                                                          | This study       |
| P5943                                                                                                           | P5934         | MG1655, <u>wzx<sub>O16</sub> gene replaced by wzx<sub>Sf2a</sub>-kan, pPR2191</u>                                                                                                          | This study       |
| P5953                                                                                                           | P5942         | MG1655, <u>wzx<sub>O16</sub> gene replaced by a kan gene, pPR2191, pPR2193</u>                                                                                                             | This study       |
| P5954                                                                                                           | P5943         | MG1655, <u>wzx<sub>O16</sub> gene replaced by wzx<sub>Sf2a</sub>-kan, pPR2191, pPR2193</u>                                                                                                 | This study       |
| P5955                                                                                                           | P5944         | MG1655, <u>wzx<sub>O16</sub> gene replaced by wzx<sub>O7</sub>-kan, pPR2191, pPR2193</u>                                                                                                   | This study       |
| P5956                                                                                                           | P5936         | MG1655, <u>wzx<sub>O16</sub> gene replaced by wzx<sub>SelT2</sub>-kan, pPR2191, pPR2193</u>                                                                                                | This study       |
| P5957                                                                                                           | P5947         | MG1655, <u>wzx<sub>O16</sub> gene replaced by wzx<sub>O111</sub>-kan, pPR2191, pPR2193</u>                                                                                                 | This study       |
| P5958                                                                                                           | P5952         | MG1655, <u>wzx<sub>O16</sub> gene replaced by wzx<sub>O157</sub>-kan, pPR2191, pPR2193</u>                                                                                                 | This study       |
| P5948                                                                                                           | P5938         | MG1655, <u>wzx<sub>O16</sub> gene replaced by wzx<sub>O111</sub>-kan, pPR2192</u>                                                                                                          | This study       |
| P5949                                                                                                           | P5937         | MG1655, <u>wzx<sub>O16</sub> gene replaced by wzx<sub>O16</sub>-kan, pPR2192</u>                                                                                                           | This study       |
| P5950                                                                                                           | P5933         | MG1655, <u>wzx<sub>O16</sub> gene replaced by wzx<sub>O7</sub>-kan, pPR2192</u>                                                                                                            | This study       |
| P5951                                                                                                           | P5934         | MG1655, <u>wzx<sub>O16</sub> gene replaced by wzx<sub>Sf2a</sub>-kan, pPR2192</u>                                                                                                          | This study       |
| M2893                                                                                                           | M388          | <i>S. enterica</i> group D2 serovar Strasbourg, <i>rpsL, ΔgalE</i>                                                                                                                         | (1)              |
| M2897                                                                                                           | M2893         | M2893, <u>wzx<sub>D</sub> gene replaced by rpsL-kan</u>                                                                                                                                    | (1)              |
| M2944                                                                                                           | M2897         | M2897, <u>pPR2190</u>                                                                                                                                                                      | This study       |
| M2896                                                                                                           | M2893         | M2893, <u>wbaV gene replaced by rpsL-kan</u>                                                                                                                                               | (1)              |
| M2950                                                                                                           | M2896         | M2896, <u>pPR2190</u>                                                                                                                                                                      | This study       |
| M2820                                                                                                           | M126          | <i>S. enterica</i> group D1 serovar Dublin, <i>ΔgalE ΔwbaV</i>                                                                                                                             | This study       |
| M2951                                                                                                           | M2820         | M2820, <u>pPR2190</u>                                                                                                                                                                      | This study       |
| Plasmids                                                                                                        |               |                                                                                                                                                                                            |                  |
| pPR2190                                                                                                         |               | pTrc99A (NcoI & BamHI) carrying the <u>wzx<sub>D</sub> gene</u> from <i>S. enterica</i> group D2 serovar Strasbourg, IPTG inducible, ampicilin resistant                                   | This study       |
| pPR2191                                                                                                         |               | pWQ572 (NcoI & BamHI) carrying the <u>wbbL gene</u> from <i>E. coli</i> K-12 strain WG1, which is controlled by tetracycline inducible P <sub>Tet</sub> promoter chloramphenicol resistant | This study       |
| pPR2192                                                                                                         |               | pPR691 carrying the <i>E. coli</i> O111 gene cluster with the <u>wzx<sub>O111</sub> gene replaced by a cat gene</u> . Kanamycin and chloramphenicol resistance                             | This study       |
| pPR2193                                                                                                         |               | <u>wzx<sub>O16</sub> from <i>E. coli</i> K-12 cloned into pWQ552 (NcoI &amp; PstI), controlled by tetracycline inducible P<sub>Tet</sub> promoter, ampicillin resistance</u>               | This study       |
| A. Genetic difference from the parent is <u>underlined</u> , including gene replacements and plasmid additions. |               |                                                                                                                                                                                            |                  |

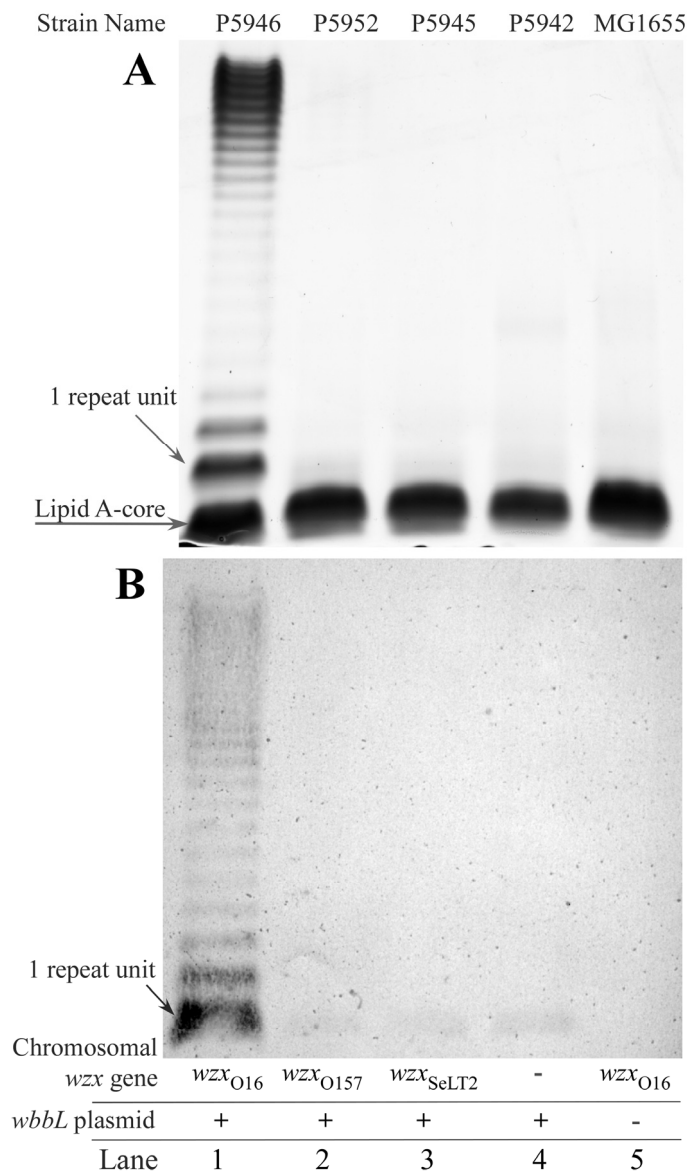

Fig. S1. The *E. coli* strain O16 variants with either a *wzx* gene for a non GlcNAc-initiated O antigen (*wzx*<sub>O157</sub> and *wzx*<sub>SeLT2</sub>) or with no O-antigen *wzx* gene, produce small amounts of LPS with a single O16 repeat unit. **A.** Silver stained SDS-PAGE. **B.** The same set of LPS, with three times the loading for **A**, were run on a SDS-PAGE, and transferred to nitrocellulose membrane for immunoblotting with monospecific anti-*E. coli* O16 antibodies as described in (1). The immunoblot shows that the small amounts of material detected above the lipid A-core in strains with either a *wzx* gene for a non GlcNAc-initiated O antigen (lanes 2 and 3) or with no O-antigen *wzx* gene (lane 4), are LPS carrying a single O16 repeat unit, whereas the negative control LPS from MG1655 lacking the *wbbL* clone and so unable to produce O16 repeat units, gave no reaction to the anti-O16 antiserum (lane 5). It should be noted that the only O16 antiserum that is commercially available to us had been diluted for slide agglutination and gave a much weaker immunoblotting signal than expected, despite that almost all of the material was used in the single experiment.

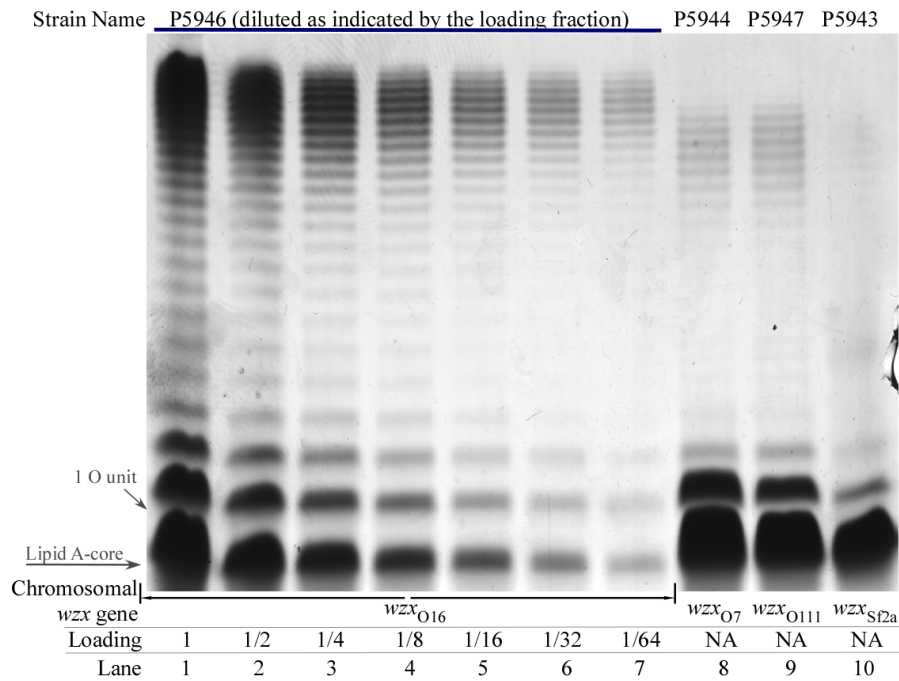

Fig. S2. Comparison of  $Wzx_{O16}$  activity with those of  $Wzx_{O7}$ ,  $Wzx_{O111}$ , and  $Wzx_{Sf2a}$ , in translocation of the *E. coli* O16 repeat unit. The strains all have the pPR2191 (*wbbL*) plasmid for initiation of O16 antigen production. The extracted LPS samples were separated in 13% Tricine-SDS-PAGE gel and silver stained. For genetic details of strains used in this figure, see Table S3.

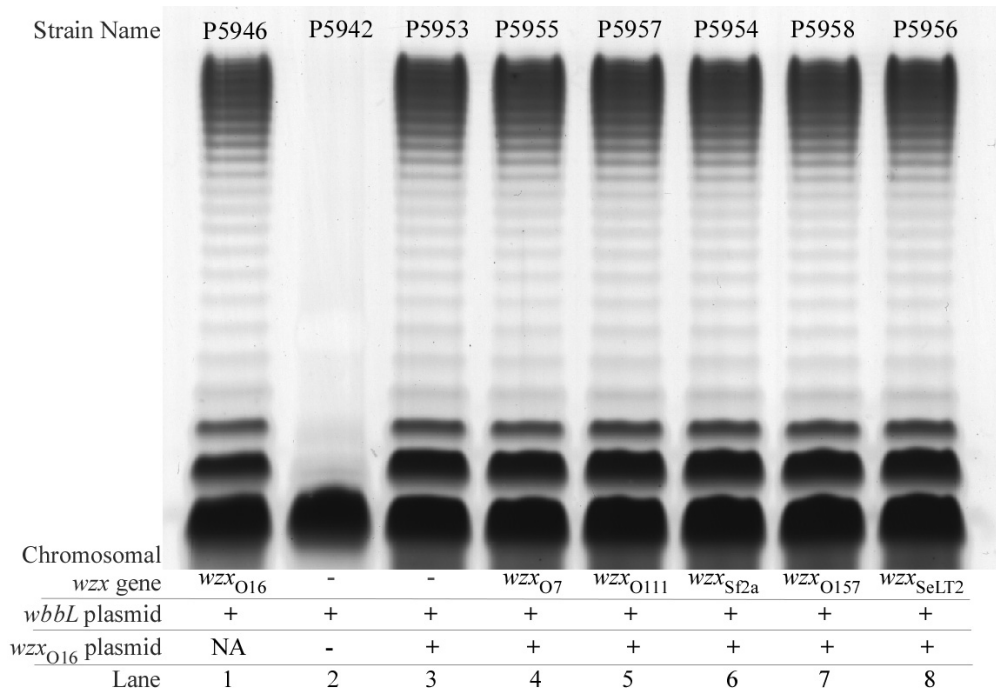

Fig. S3. The LPS profile of *E. coli* strain K-12 variants with different *wzx* genes after addition of the *wzx*<sub>O16</sub> clone (pPR2193) to test for complementation. The extracted LPS samples were separated in 13% tricine SDS-PAGE and silver stained. For the genetic detail of strains used in this figure, see Table S3.



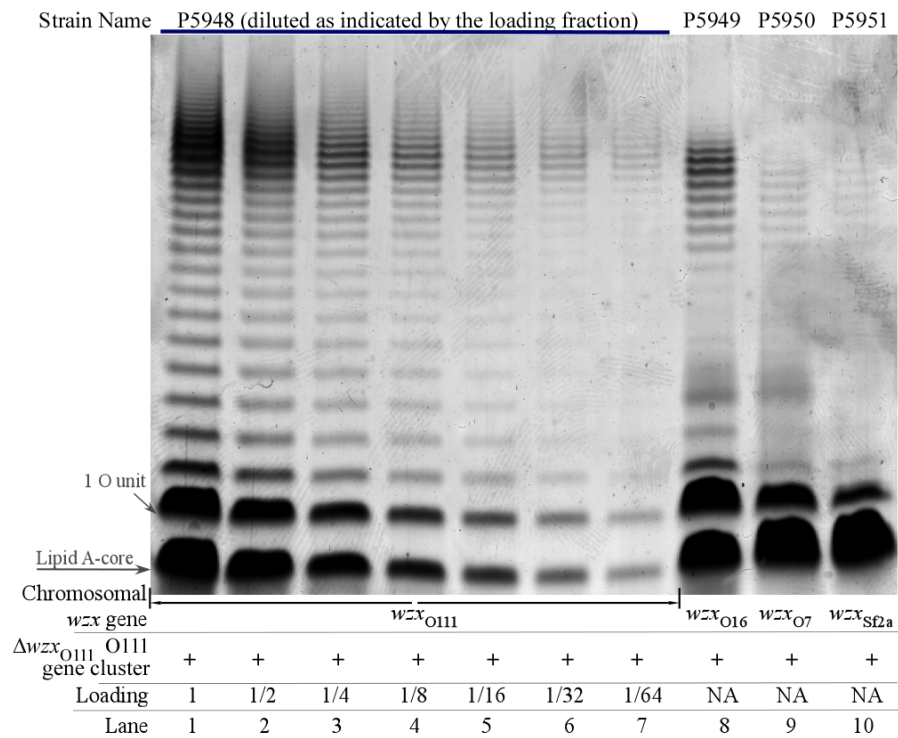

Fig. S4. A comparison of *Wxz*<sub>O111</sub> activity with those of *Wxz*<sub>O16</sub>, *Wxz*<sub>O7</sub>, and *Wxz*<sub>Sf2a</sub>, for translocation of the *E. coli* O111 repeat unit. The plasmid, pPR2192 carrying the O111 gene cluster lacking the *wxz*<sub>O111</sub> gene, is present in the strains examined for synthesis of O111 repeat units. The extracted LPS samples were separated in 13% Tricine-SDS-PAGE gel and stained by silver nitrate. For the genetic details of strains used in this figure, see Table S3.

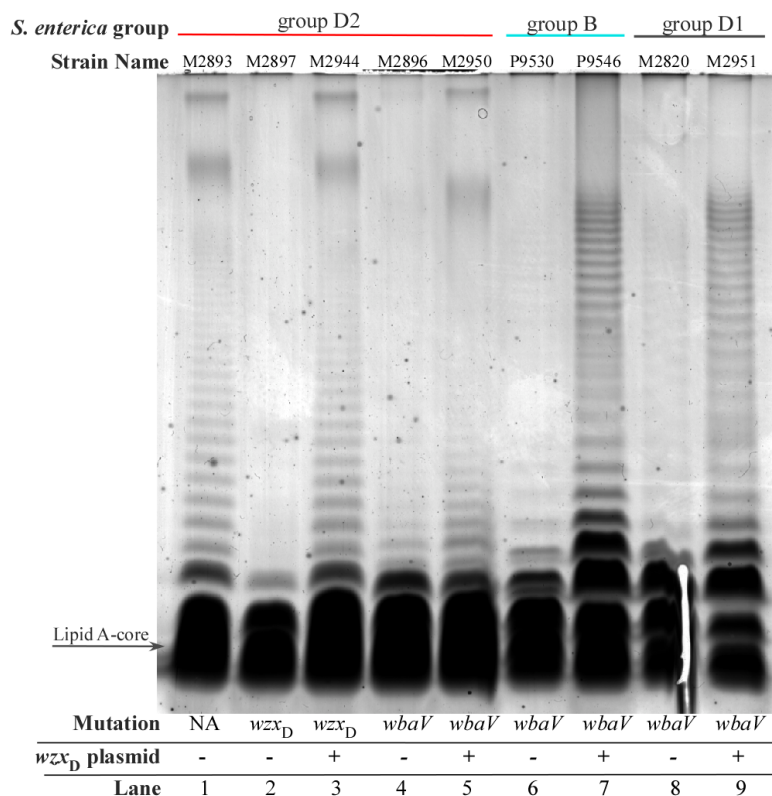

Fig. S5. Effect of over-expression of the *wzx<sub>D</sub>* gene in  $\Delta wbaV$  mutants of *Salmonella enterica* groups D2, B1 and D1, that produce repeat units lacking the side-branch tyvelose or abequose. B1, D2 and D1  $\Delta wbaV$  strains lack the side-branch dideoxyhexose that is normally present (1) and make very little long-chain O antigen as shown previously for groups B1 and D2 (1) (lanes 4, 6 and 8 respectively). Addition of a cloned *wzx<sub>D</sub>* gene (lanes 5, 7 and 9 respectively) restored wild-type O-antigen levels (lane 1). Note that the Wzx translocases from groups B1 and D2 are known not distinguish between abequose and tyvelose under these experimental conditions (1).

The strains were grown according to Hong *et al.* (1), with IPTG (1mM final concentration) added at the same time as galactose addition. The extracted LPS samples were separated in 13% Tricine-SDS-PAGE gel and silver stained. For genetic details of strains used in this figure, see Table S3.

## Reference

1. **Hong Y, Cunneen MM, Reeves PR.** 2012. The Wzx translocases for *Salmonella enterica* O-antigen processing have unexpected serotype specificity. *Mol. Microbiol.* **84**:620-630.
